# Supplementary material for: Preparation of graphite-like carbon nitride nanoflake film with strong fluorescent and electrochemiluminescent activity
Source: Royal Society of Chemistry journal article supplement (doi:10.1039/c2nr32248j), 2012-10-23
Supplement: c2nr32248j.pdf [file c2nr32248j.pdf]

## Supporting Information

Preparation of graphite-like carbon nitride nanoflake film  
with strong fluorescent and electrochemiluminescent  
activities

*Lichan Chen, Danjun Huang, Shuyan Ren, Tongqing Dong, Yuwu Chi\**  
*and Guonan Chen*

MOE Key Laboratory of Analysis and Detection Technology for Food Safety, Fujian  
Provincial Key Laboratory of Analysis and Detection Technology for Food Safety,  
and Department of Chemistry, Fuzhou University, Fujian 350108, China.

\*Email: y.w.chi@fzu.edu.cn

## 1. Fluorescence Quantum Yield (FLQY) Measurements

The quantum yield of the graphite-like carbon nitride nanoflake particles (g-C<sub>3</sub>N<sub>4</sub> NFPs) was measured by following equation:

$$Q = Q_R \cdot \frac{I}{I_R} \cdot \frac{OD_R}{OD} \cdot \frac{n^2}{n_R^2}$$

where  $Q$  is the quantum yield,  $I$  is the measured integrated emission intensity,  $n$  is the refractive index, and  $OD$  is the optical density, which is measured on a UV-Vis spectrophotometer. The subscript  $R$  refers to the reference fluorophore of known quantum yield, i.e. quinine sulfate (QS) used in present work. The quinine sulfate (literature  $\Phi=0.54$ ) was dissolved in 0.1 M H<sub>2</sub>SO<sub>4</sub> ( $n=1.33$ ) and the g-C<sub>3</sub>N<sub>4</sub> NFPs was dissolved in distilled water ( $n=1.33$ ). By the above equation, the FLQY of the g-C<sub>3</sub>N<sub>4</sub> NFPs was measured to be 3.0 %.

## 2. FL responses of g-C<sub>3</sub>N<sub>4</sub> NFFs in the presence of various metal ions

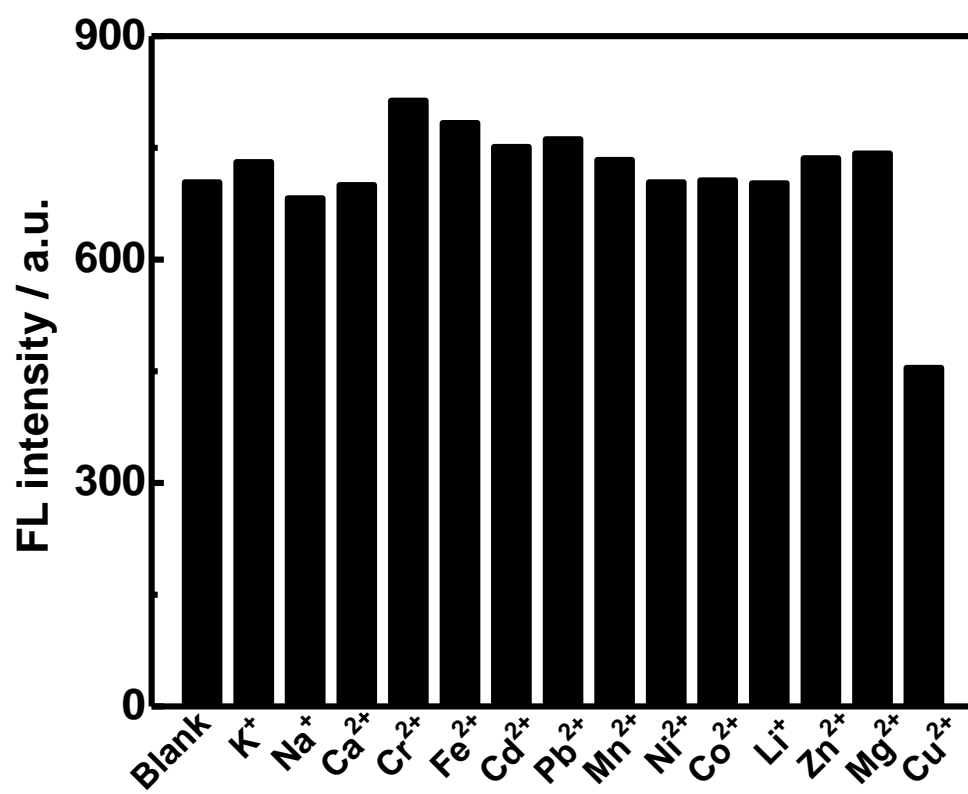

Fig.S1. FL responses of g-C<sub>3</sub>N<sub>4</sub> NFFs in the presence of various metal ions with concentration of 100 μM

### 3. Effect of ion strength on the FL of g-C<sub>3</sub>N<sub>4</sub> NFFs

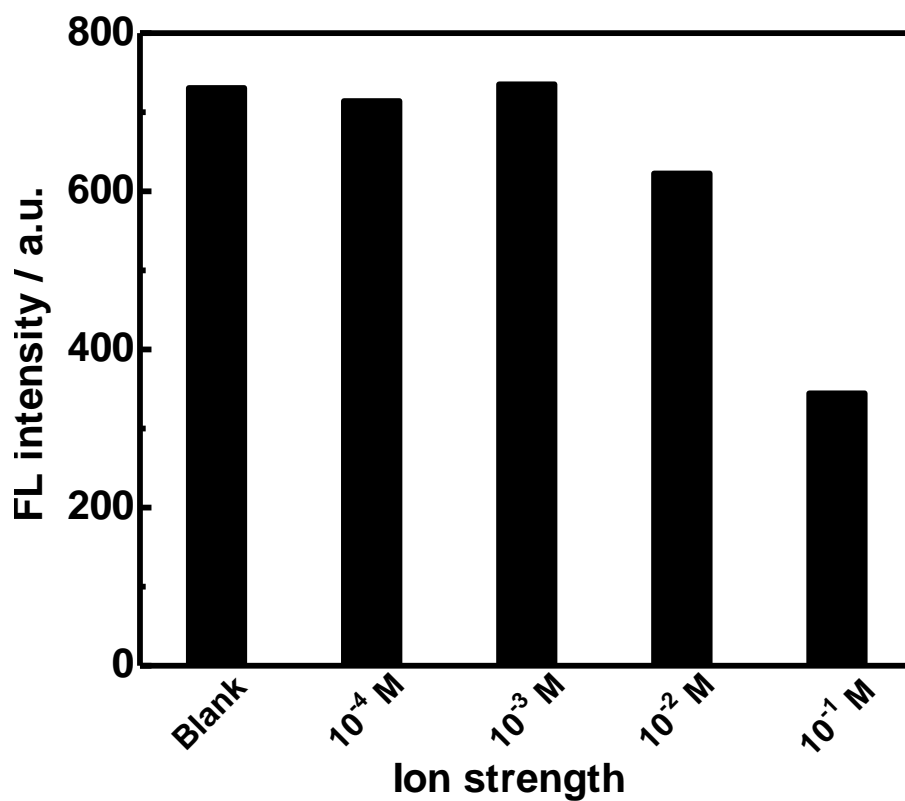

Fig.S2. FL responses of g-C<sub>3</sub>N<sub>4</sub> NFFs in various solutions containing different concentrations of KNO<sub>3</sub>.

#### 4. Effect of pH on the FL of g-C<sub>3</sub>N<sub>4</sub> NFFs

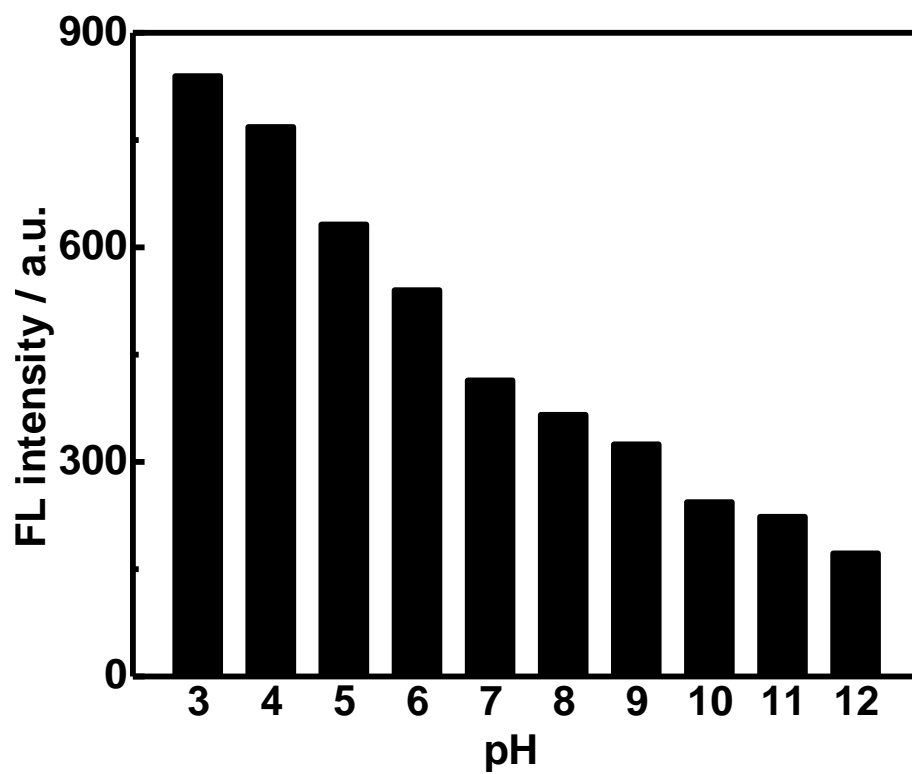

Fig.S3. FL responses of g-C<sub>3</sub>N<sub>4</sub> NFFs in various pH solution (0.1 M phosphate).

## 5. Comparison of ECL activity of g-C<sub>3</sub>N<sub>4</sub> NFFs with that of carbon quantum dots (CQDs) in the presence of S<sub>2</sub>O<sub>8</sub><sup>2-</sup>

For further demonstrating how strong the ECL of g-C<sub>3</sub>N<sub>4</sub> NFFs was, the ECL response of g-C<sub>3</sub>N<sub>4</sub> NFFs was compared with that of previously reported carbon quantum dots (CQDs) in the presence of same concentration (1 mM) of S<sub>2</sub>O<sub>8</sub><sup>2-</sup>. As shown in Fig. S4, the ECL intensity of g-C<sub>3</sub>N<sub>4</sub> NFFs–S<sub>2</sub>O<sub>8</sub><sup>2-</sup> system can be 65 times as large as that of CQDs–S<sub>2</sub>O<sub>8</sub><sup>2-</sup> system, indicating that the ECL activity of g-C<sub>3</sub>N<sub>4</sub> NFFs is much higher than that of CQDs.

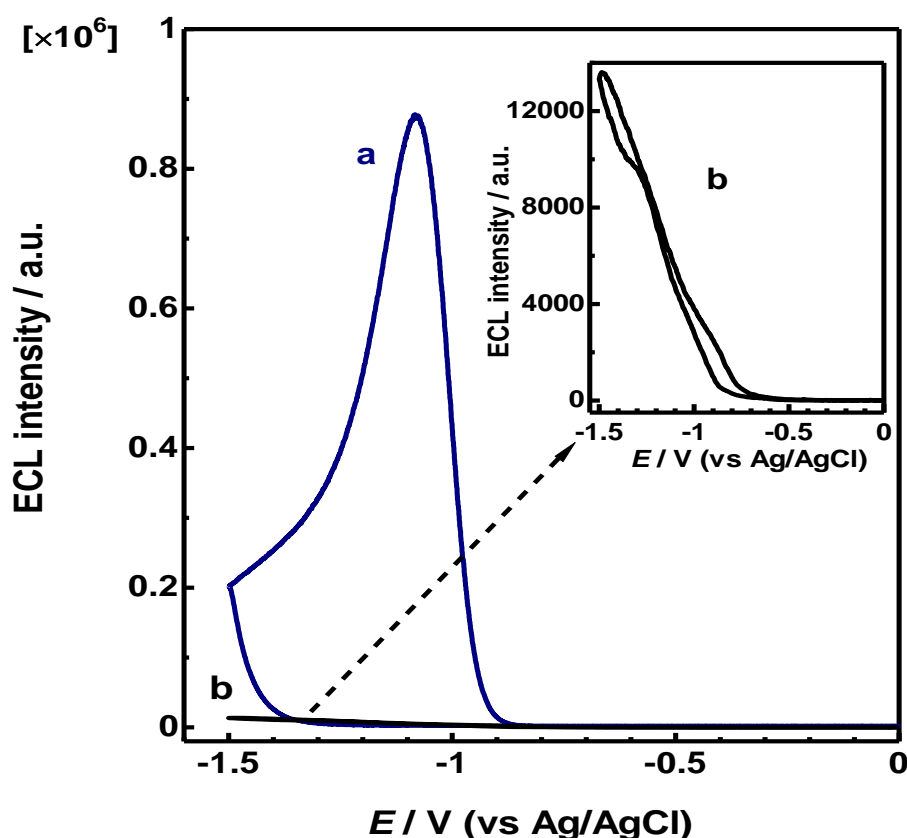

Fig. S4. Comparison of ECL responses of g-C<sub>3</sub>N<sub>4</sub> NFFs–S<sub>2</sub>O<sub>8</sub><sup>2-</sup> with that of carbon quantum dots (CQDs) –S<sub>2</sub>O<sub>8</sub><sup>2-</sup> at GC electrode in 0.1 M PBS (pH 7.0). The concentrations of S<sub>2</sub>O<sub>8</sub><sup>2-</sup> were all 1 mM. The potential scan rates were all 100 mV s<sup>-1</sup>.
